# Supplementary material for: Structural engineering of waterborne polyurethane for high performance waterproof coatings
Source: Royal Society of Chemistry journal article supplement (doi:10.1039/c5ra12480h), 2015-01-01
Supplement: c5ra12480h1.pdf [file c5ra12480h1.pdf]

Supporting Information

**Structural engineering of waterborne polyurethane for high performance waterproof coatings**

Fangfang Yu,<sup>a</sup> Xiangyu Xu,<sup>a</sup> Naibo Lin<sup>\*a</sup> and Xiang Yang Liu<sup>\*b, a</sup>

<sup>a</sup> Research Institute for Biomimetics and Soft Matter, Xiamen University, Xiamen, 361005, China.

<sup>b</sup> Department of Physics, National University of Singapore, 2 Science Drive 3, Singapore, 117542, Singapore.

\* Corresponding author: Tel.: +65-6516 2812; Fax: Fax: +65-6777 6126

E-mail address: linnaibo@xmu.edu.cn (N. B. Lin); phyliuxy@nus.edu.sg (X. Y. Liu)

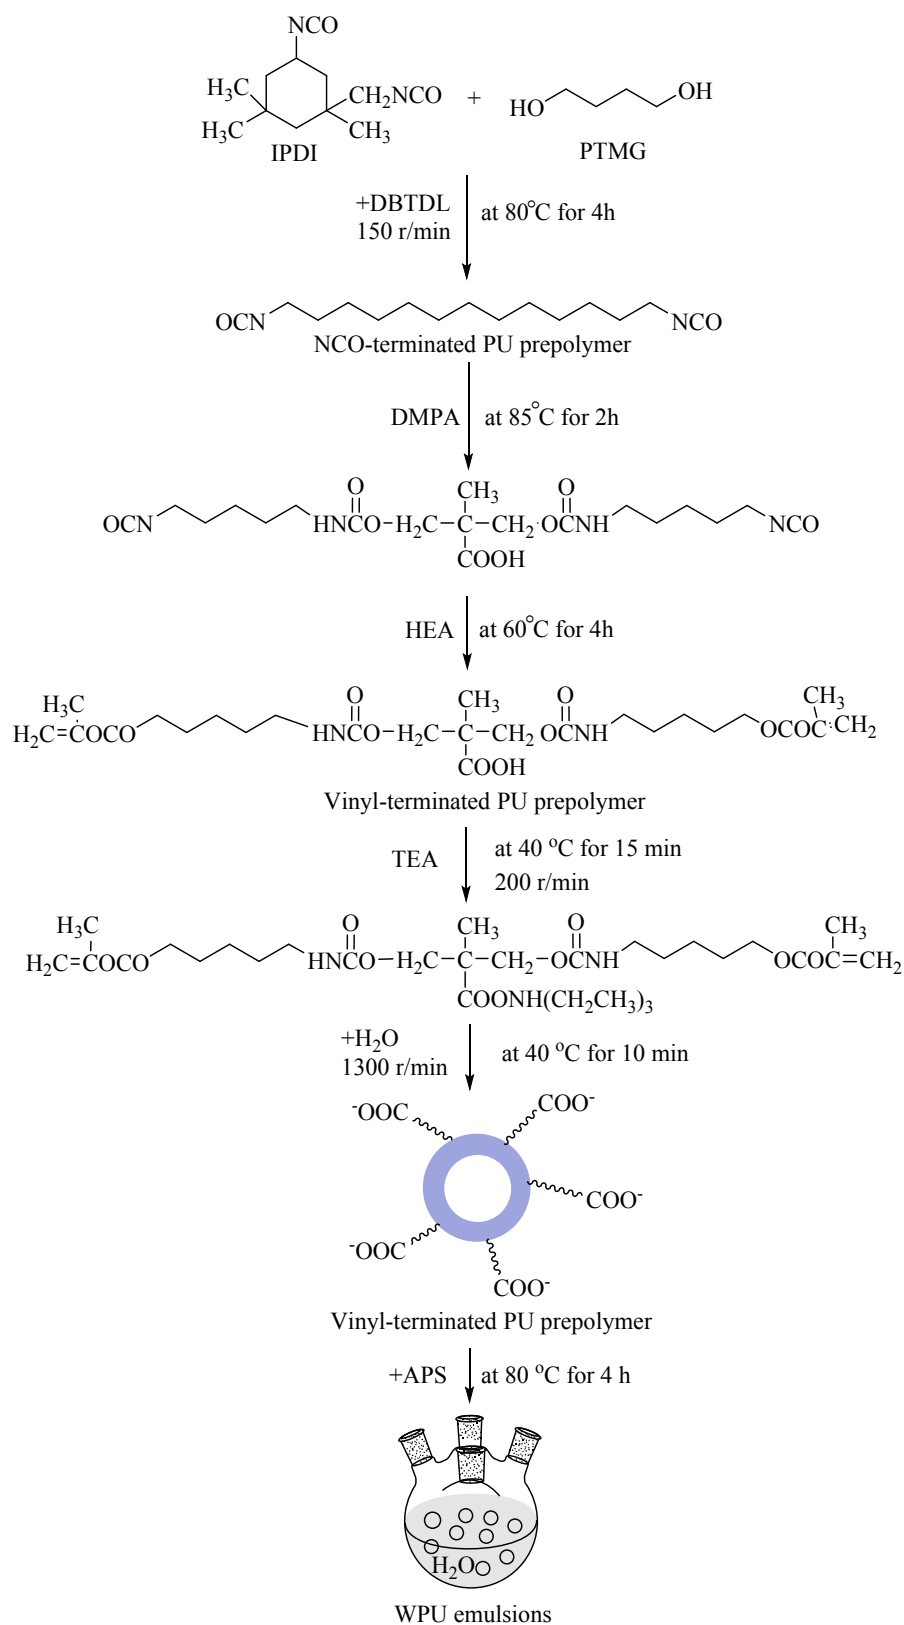

**Scheme S1** The preparation of WPU emulsions

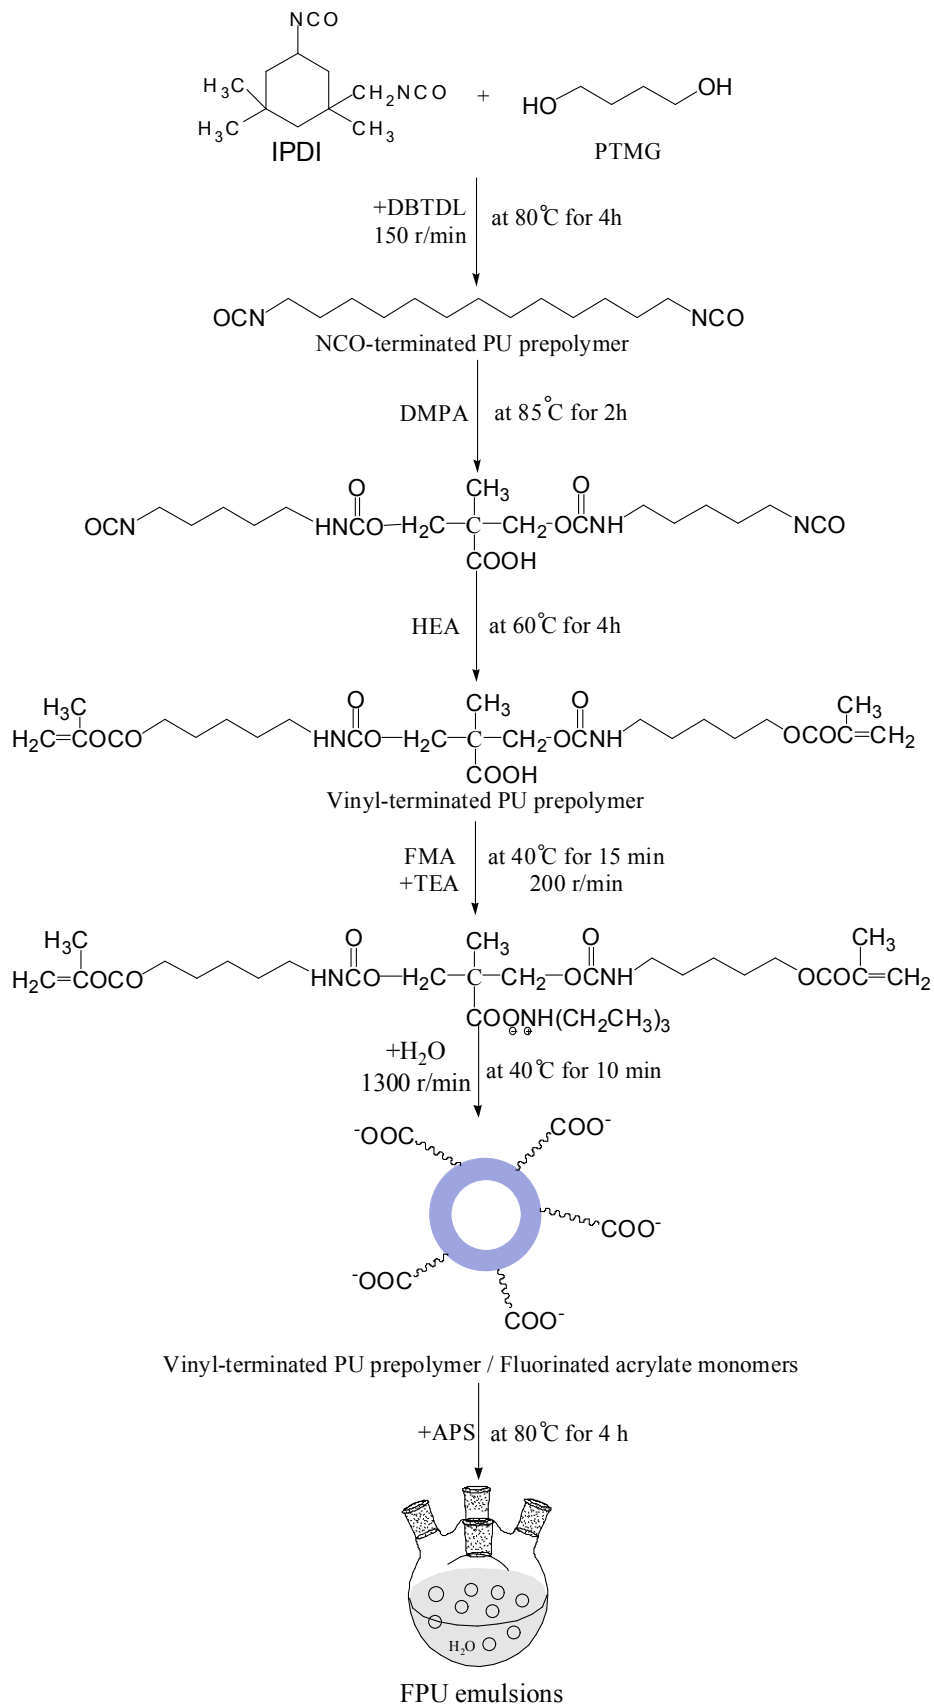

**Scheme S2** The preparation of FPU emulsions

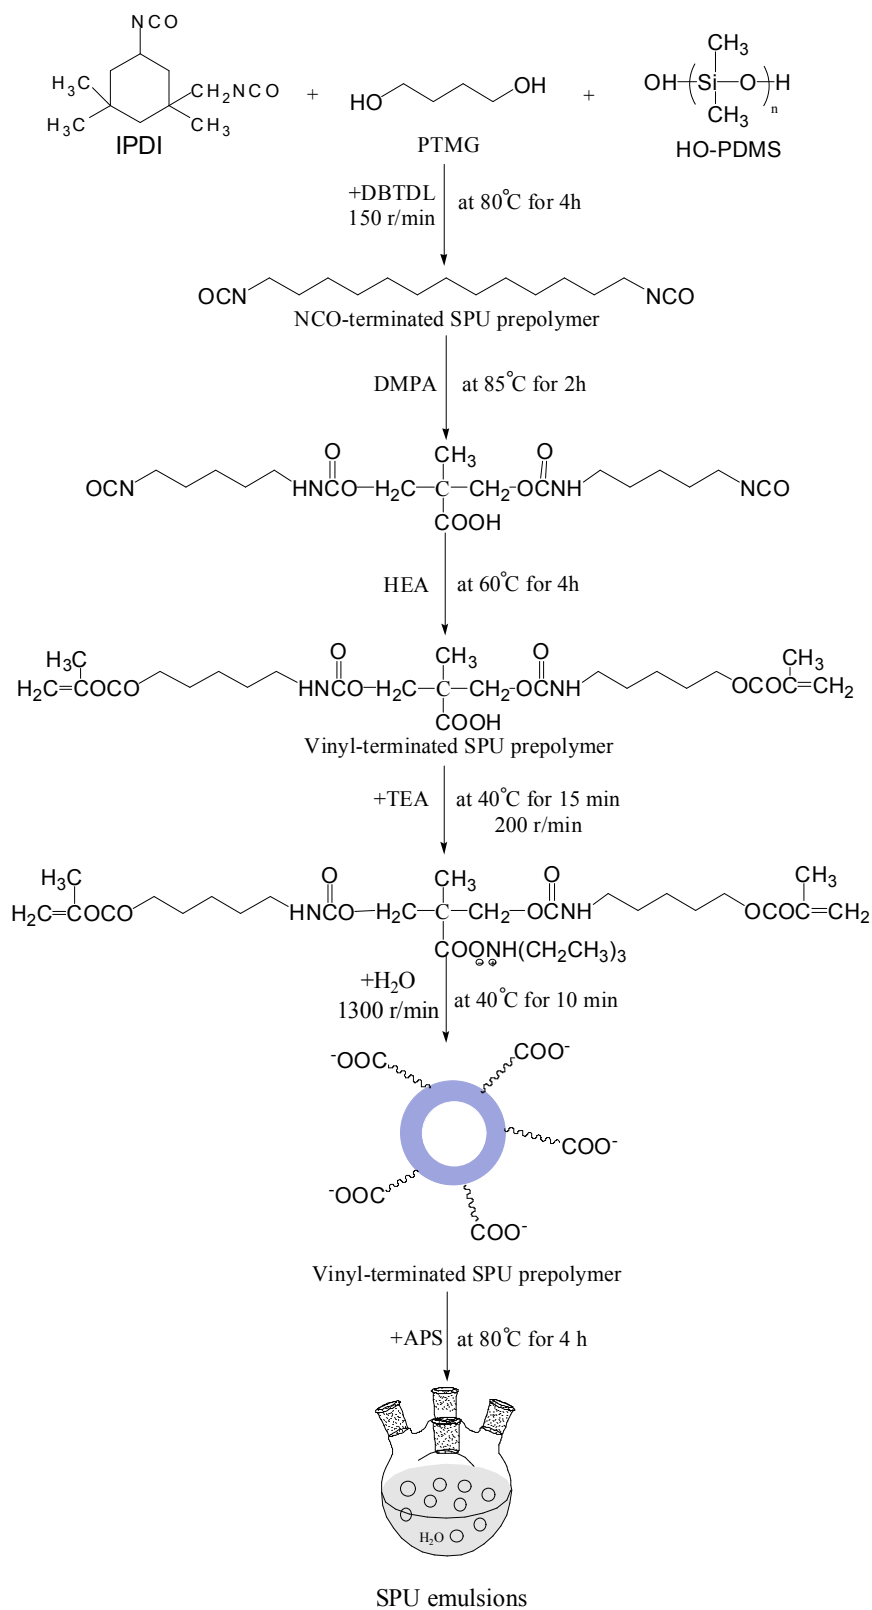

**Scheme S3** The preparation of SPU emulsions

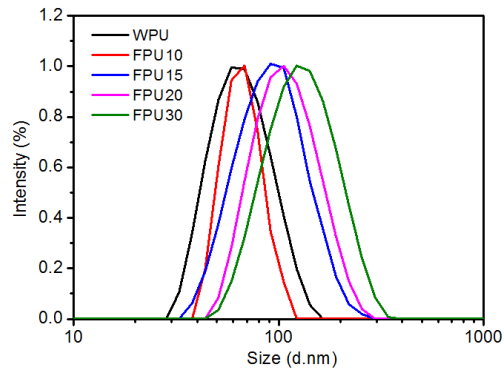

**Figure S1** Particle sizes and distributions of FPU dispersions

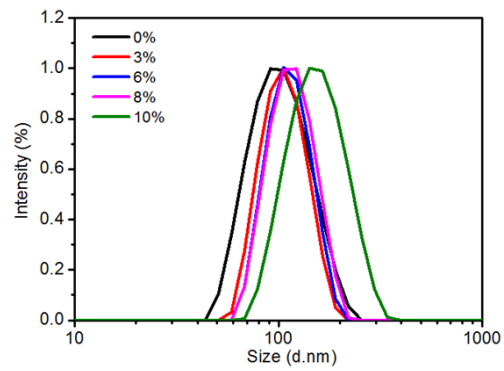

**Figure S2** Particle sizes and distributions of SPU dispersions

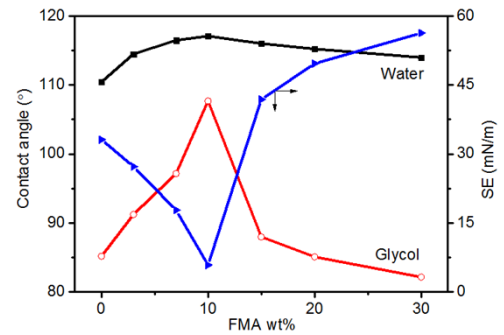

**Figure S3** Surface energies of FPU hybrid films

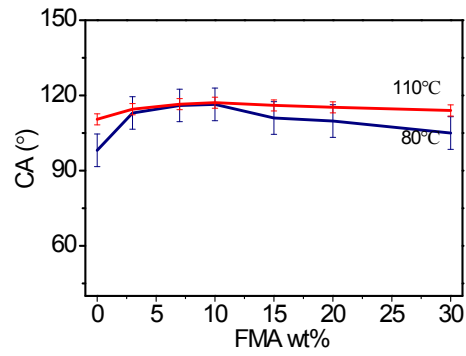

**Figure S4** Water contact angles of different FPU

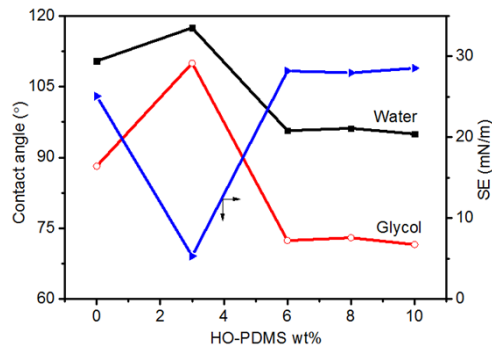

**Figure S5** Surface energies of SPU hybrid films

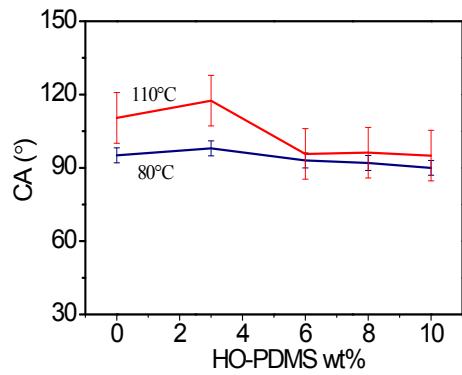

**Figure S6** Water contact angles of SPU hybrid films

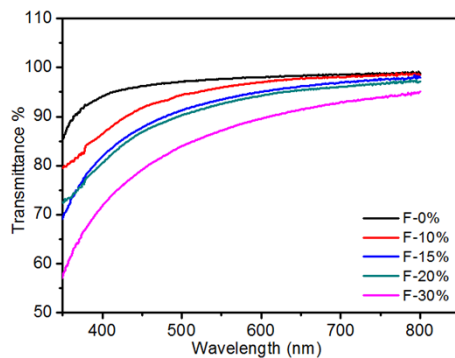

**Figure S7** UV-vis curves of different FPUs

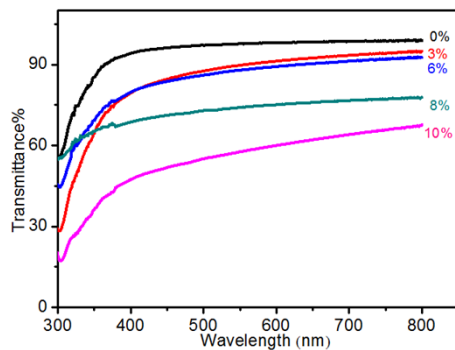

**Figure S8** UV-vis curves of different SPUs

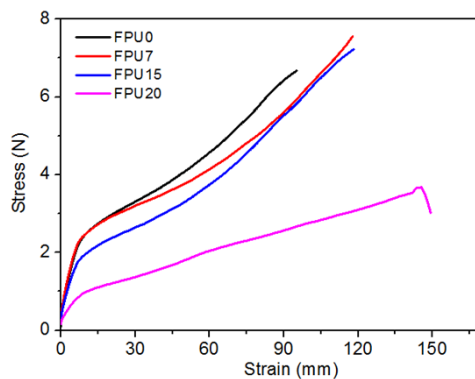

**Figure S9** Strain-stress curves of different FPUs

**Table S1** UTM results and solvent absorptions of FPU hybrid films

| Sample | Mechanical properties |                        |                         | Solvent absorption |               |
|--------|-----------------------|------------------------|-------------------------|--------------------|---------------|
|        | Modulus (MPa)         | Tensile strength (MPa) | Elongation at break (%) | Water (%)          | N-heptane (%) |
| WPU    | 0.36                  | 2.34                   | 246.6                   | 39                 | 17.1          |
| FPU10  | 0.31                  | 1.71                   | 307.1                   | 38                 | 13.3          |
| FPU15  | 0.24                  | 1.44                   | 395.4                   | 32.2               | 11.1          |
| FPU20  | 0.2                   | 1.12                   | 468.6                   | 43.9               | 20.2          |
| FPU30  | -                     | -                      | -                       | -                  | -             |

- No test results

**Table S2** UTM results and solvent absorptions of SPU hybrid films

| Sample | Mechanical properties |                        |                         | Solvent absorption |               |
|--------|-----------------------|------------------------|-------------------------|--------------------|---------------|
|        | Modulus (MPa)         | Tensile strength (MPa) | Elongation at break (%) | Water (%)          | N-heptane (%) |
| SPU3   | 0.19                  | 2.1                    | 265.2                   | 33.5               | 29.1          |
| SPU6   | 0.15                  | 1.8                    | 337.9                   | 20                 | 17.1          |
| SPU8   | 0.11                  | 1.7                    | 451.6                   | 19.2               | 16.9          |
| SPU10  | 0.1                   | 1.03                   | 578.3                   | 44.4               | 74.9          |

**Table S3** Viscosities, average particle sizes, contact angles and storage stabilities of FPU hybrid emulsions

| Sample | Viscosity (Pa·s) <sup>a</sup> | Average particle size | Contact angle <sup>b</sup> | Film stability (110°C) | Storage stability <sup>c</sup> |
|--------|-------------------------------|-----------------------|----------------------------|------------------------|--------------------------------|
| WPU    | 0.87                          | 73.67                 | 111.05                     | yellow                 | Stable                         |
| FPU3   | 0.69                          | 84                    | 118.64                     | yellow                 | Stable                         |
| FPU15  | 0.61                          | 107                   | 117.97                     | yellow                 | Stable                         |
| FPU20  | 0.46                          | 113                   | 119.46                     | yellow                 | Stable                         |
| FPU30  | 0.11                          | 123.6                 | 113.5                      | yellow                 | Unstable                       |

<sup>a</sup> The viscosity of  $\gamma=10$ .

<sup>b</sup> The max CA of film was dried at 110°C.

<sup>c</sup> The storage stability after 3 months.

**Table S4** Viscosities, average particle sizes, contact angles and storage stabilities of SPU hybrid emulsions

| Sample | Viscosity (Pa·s) <sup>a</sup> | Average particle size | Contact angle <sup>b</sup> | Film stability (110°C) | Storage stability <sup>c</sup> |
|--------|-------------------------------|-----------------------|----------------------------|------------------------|--------------------------------|
| SPU3   | 0.69                          | 102.4                 | 124.44                     | colorless              | Stable                         |
| SPU6   | 0.57                          | 109.2                 | 116.98                     | colorless              | Stable                         |
| SPU8   | 0.33                          | 111.6                 | 100.01                     | colorless              | Unstable                       |
| SPU10  | 0.21                          | 145                   | 99                         | colorless              | Unstable                       |

<sup>a</sup> The viscosity of  $\gamma=10$ .

<sup>b</sup> The max contact angle of film was dried at 110°C.

<sup>c</sup> The storage stability after 3 months.
